# Supplementary material for: Low-temperature PROX (preferential oxidation) on novel CeO2-supported Cu-cluster catalysts under fuel-cell operating conditions
Source: Royal Society of Chemistry journal article supplement (doi:10.1039/b709176a), 2007-01-01
Supplement: b709176a.pdf [file b709176a.pdf]

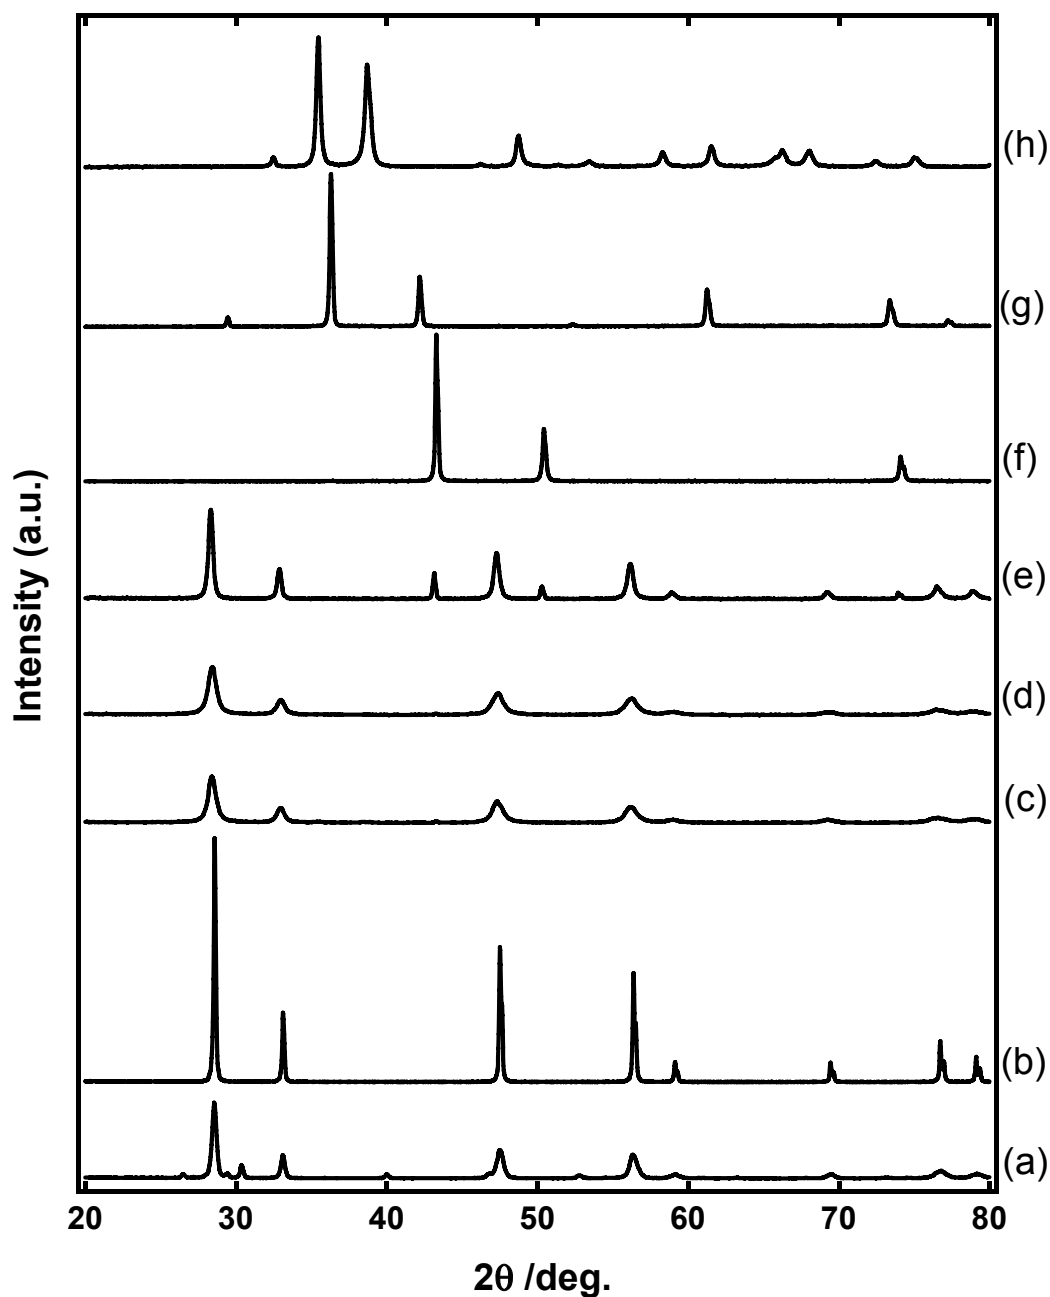

Supporting Information 1 XRD patterns of Cu catalysts and references. (a)  $\text{CeO}_2$ , (b)  $\text{Ce}_2\text{O}_3$ , (c) fresh Cu/Ce-CTAB (7.5 Cu wt%), (d) Cu/Ce-CTAB after PROX reaction (7.5 Cu wt%), (e) fresh Cu/Ce-CTAB (15 Cu wt%), (f) Cu, (g)  $\text{Cu}_2\text{O}$ , and (h) CuO.

Supporting Information 2 Curve-fitting results of Cu K-edge EXAFS measured at 300 K for the  
Cu/Ce-CTAB catalyst (7.5 Cu wt%)

| Catalyst            | Shell | CN            | Distance /nm      | $\sigma^2 / 10^{-5} \text{ nm}^2$ |                             |
|---------------------|-------|---------------|-------------------|-----------------------------------|-----------------------------|
| Fresh               | Cu-O  | $2.5 \pm 0.2$ | $0.194 \pm 0.001$ | $6 \pm 1$                         | $\Delta E_0 = 7 \text{ eV}$ |
|                     | Cu-Cu | $1.1 \pm 0.3$ | $0.256 \pm 0.001$ | $9 \pm 2$                         | $R_f = 0.8\%$               |
| After PROX reaction | Cu-O  | $2.4 \pm 0.2$ | $0.195 \pm 0.001$ | $5 \pm 1$                         | $\Delta E_0 = 8 \text{ eV}$ |
|                     | Cu-Cu | $0.9 \pm 0.3$ | $0.257 \pm 0.001$ | $8 \pm 3$                         | $R_f = 1.7\%$               |

$k=30\text{-}130 \text{ nm}^{-1}$ ,  $R=0.11\text{-}0.29 \text{ nm}$ .

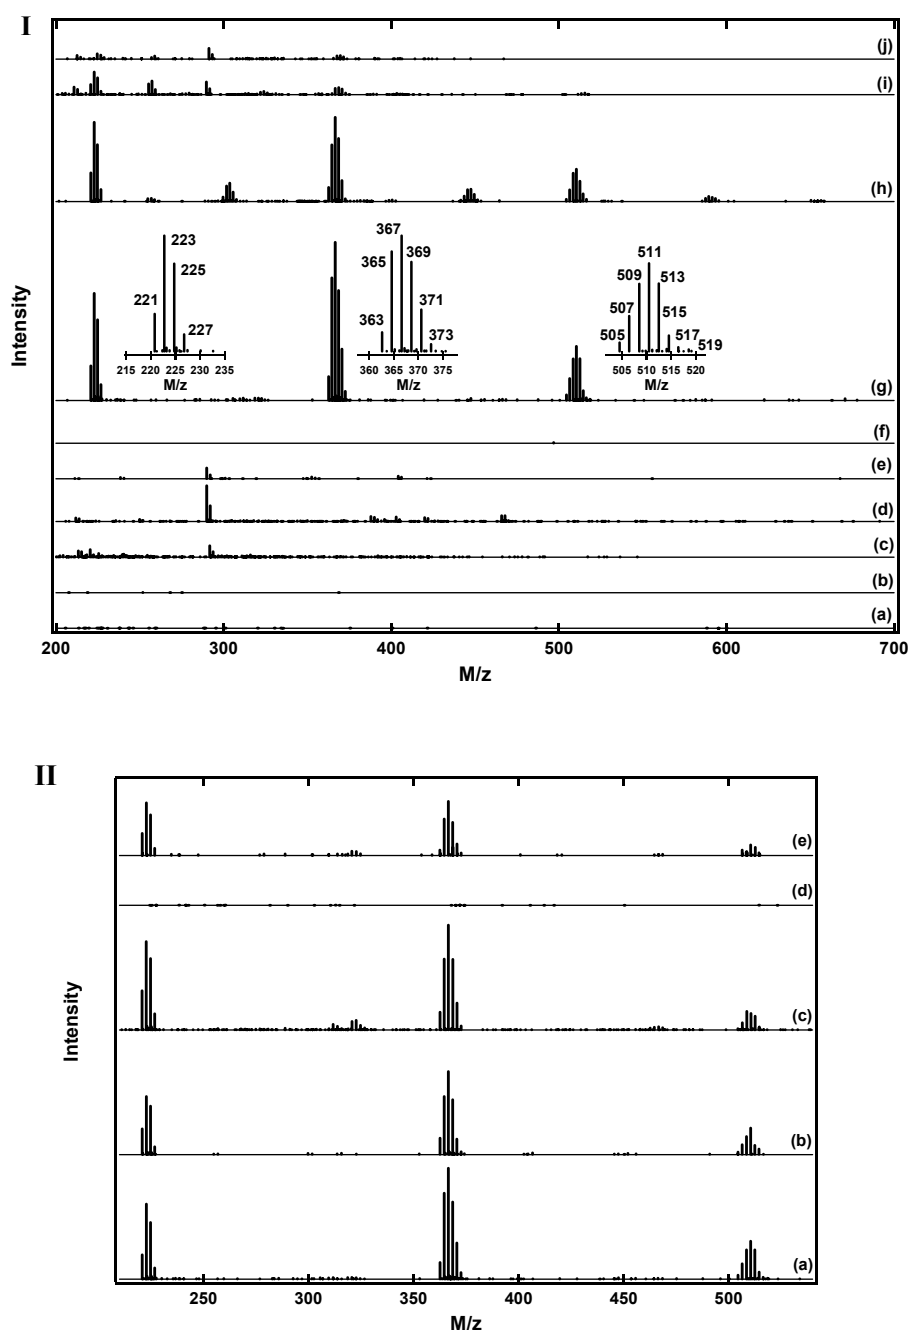

Supporting Information 3 (I) LDI-MASS of Cu/Ce catalysts. (a)  $\text{Ce}_2\text{O}_3$ , (b)  $\text{CeO}_2$ , (c) Cu, (d)  $\text{Cu}_2\text{O}$ , (e) CuO, (f) Cu-CTAB, (g) fresh Cu/Ce-CTAB (7.5 Cu wt%), (h) fresh Cu/Ce-CTAB (15 Cu wt%), (i) co-precipitated Cu-Ce, and (j) impregnated Cu/ $\text{CeO}_2$ . (II) LDI-MASS of the Cu/Ce-CTAB catalyst (7.5 Cu wt%). (a) Fresh catalyst, (b) after the PROX for 2 h, (c) fresh catalyst treated with CO (20 kPa) at 90 °C for 1 h, (d) fresh catalyst treated with  $\text{O}_2$  (20 kPa) at 90 °C for 1 h, and (e) the  $\text{O}_2$  adsorption, followed by evacuation and subsequent exposure to CO (20 kPa) at 90 °C for 1 h.
